# Supplementary material for: Relationship Analysis of Local Community Participation in Sustainable Ecotourism Development in Protected Areas, Iran
Source: MDPI journal article supplement (doi:10.3390/land11101871), 2022-10-21
Supplement: s1 [file s1]

**Relationship Analysis of Local Community  
Participation in Sustainable Ecotourism Development  
in Protected Areas, Iran**

**Table S1.** List of sustainable ecotourism indicators along the environmental-physical dimension

| Variables                                | Indicators                                                       | References  |
|------------------------------------------|------------------------------------------------------------------|-------------|
| Environmental pollution                  | Water pollution                                                  | [6,7,40-62] |
|                                          | Soil pollution                                                   |             |
|                                          | Air pollution                                                    |             |
|                                          | Noise pollution                                                  |             |
| Ecosystems                               | Changes in habitat integration                                   |             |
|                                          | Land use and land cover changes                                  |             |
|                                          | Area's ecological potential for intensive ecotourism development |             |
|                                          | Area's ecological potential for extensive ecotourism development |             |
| Biodiversity                             | Flora and fauna biodiversity                                     |             |
|                                          | Endangered species percentage                                    |             |
| Ecotourism carrying capacity             | Physical carrying capacity                                       |             |
|                                          | Real carrying capacity                                           |             |
|                                          | Effective carrying capacity                                      |             |
| Safety                                   | Emergency services accessibility                                 |             |
|                                          | Fire services accessibility                                      |             |
|                                          | Feeling of driving safety level on the road                      |             |
| Ecotourism infrastructure and facilities | Health care accessibility                                        |             |
|                                          | Garbage container accessibility                                  |             |
|                                          | Wastewater disposal system accessibility                         |             |
|                                          | Drinking water accessibility                                     |             |
|                                          | Transport networks accessibility                                 |             |
|                                          | Public transportation network quality                            |             |
|                                          | Public parking lots accessibility                                |             |
|                                          | Canopies and tent installation platforms accessibility           |             |
|                                          | Religious and cultural places accessibility                      |             |
|                                          | Restaurant and grocery store accessibility                       |             |
|                                          | Restaurant and grocery store quality                             |             |
|                                          | Access to accommodation                                          |             |
|                                          | Accommodation quality                                            |             |
|                                          | Theaters and cinemas accessibility                               |             |
|                                          | Health facilities accessibility                                  |             |
|                                          | Access to various roads                                          |             |
|                                          | Quality of various roads                                         |             |
|                                          | Tour agencies accessibility                                      |             |
|                                          | Information signs accessibility                                  |             |
|                                          | Natural ecotourism attractions accessibility                     |             |
|                                          | Cultural and historical ecotourism attractions accessibility     |             |
|                                          | Access to man-made tourism attractions                           |             |

**Table S2.** List of sustainable ecotourism indicators along the socio-demographic dimension

| Variables           | Indicators                                                                     | References                 |
|---------------------|--------------------------------------------------------------------------------|----------------------------|
| Satisfaction        | Satisfaction of ecotourism from local communities                              |                            |
|                     | Satisfaction from local communities' behavior and acceptance                   |                            |
|                     | Satisfaction with maintaining welfare facilities and ecotourism infrastructure |                            |
|                     | Satisfaction of maintaining cultural, historical and archeological monuments   |                            |
|                     | Satisfaction of maintaining herb and woody species                             |                            |
|                     | Satisfaction of maintaining animals                                            |                            |
|                     | Satisfaction of maintaining the environment against pollutions                 |                            |
|                     | Satisfaction of environmental health status                                    |                            |
|                     | Satisfaction of road traffic situation                                         |                            |
| Participation       | Satisfaction of ecotourism from local communities                              |                            |
|                     | Level of participation in planting seedling                                    |                            |
|                     | Level of participation in feeding the animal species                           |                            |
|                     | Level of participation in protection of historical and archeological monuments |                            |
|                     | Level of participation in maintaining water resources from pollutions          |                            |
|                     | Level of participation in maintaining nature clean                             |                            |
|                     | Level of participation in protection of tourism infrastructure                 |                            |
| Feeling of security | Level of participation in protection of local facilities and services          | [6,7,41,43-52,54-59,61,62] |
|                     | Level of participation in respecting local residents                           |                            |
|                     | Level of sense of security among tourists                                      |                            |
| Population density  | Level of security among local communities                                      |                            |
|                     | Level of security among environmental guardians                                |                            |
|                     | Level of access to police                                                      |                            |
| Culture             | Density of local residents                                                     |                            |
|                     | Migration of local residents                                                   |                            |
| Justice             | Value of education among local residents                                       |                            |
|                     | Development of novel cultural and moral values among local residents           |                            |
|                     | Loyalty to actual local values and traditions                                  |                            |
|                     | Access to a variety of local services                                          |                            |
|                     | Access to tourism infrastructure                                               |                            |
|                     | Participation and presence of women in development of ecotourism               |                            |
|                     | Number of job opportunities for local residents                                |                            |
|                     | Number of employees of local households                                        |                            |
|                     | Wage level of local residents                                                  |                            |
|                     | Buying power of local households                                               |                            |
|                     | Income of local households                                                     |                            |
|                     | Cost of local households                                                       |                            |

**Table S3.** List of sustainable ecotourism indicators along the economic-institutional dimension

| Variables                                      | Indicators                                                                                                                                                     | References             |
|------------------------------------------------|----------------------------------------------------------------------------------------------------------------------------------------------------------------|------------------------|
| Information and communication infrastructure   | Access to the telecommunication network                                                                                                                        | [40-48,50,54-59,61,63] |
|                                                | Access to internet                                                                                                                                             |                        |
|                                                | Access to banking services and ATMs                                                                                                                            |                        |
|                                                | Access to information centers                                                                                                                                  |                        |
|                                                | Access to newspapers                                                                                                                                           |                        |
|                                                | Mobile antenna status                                                                                                                                          |                        |
|                                                | Radio and TV antenna status                                                                                                                                    |                        |
| Local prices                                   | Prices of food and commodities                                                                                                                                 |                        |
|                                                | Prices of accommodations                                                                                                                                       |                        |
|                                                | Prices of land and property                                                                                                                                    |                        |
| Employments                                    | Level of employment in industrial sector                                                                                                                       |                        |
|                                                | Level of employment in service sector                                                                                                                          |                        |
|                                                | Level of employment in agricultural sector                                                                                                                     |                        |
|                                                | Level of employment in technology and information sector                                                                                                       |                        |
|                                                | Level of employment in ecotourism activities                                                                                                                   |                        |
| Governmental and non-governmental institutions | Access to government institutions<br>Access to non-governmental organizations (tourism agencies, NGO, local councils, institutions, service enterprises, etc.) |                        |
| Government investments                         | Level of government financial support                                                                                                                          |                        |
| Monitoring and control                         | Level of monitoring and control in area                                                                                                                        |                        |
| Institutional cooperation                      | Level of cooperation between relevant organizations                                                                                                            |                        |
| Quality of managerial functions                | Quality of managers' performance in training and information                                                                                                   |                        |
|                                                | Quality of performance of local tour guides                                                                                                                    |                        |
|                                                | Quality of performance of environmental guardians                                                                                                              |                        |
| Ecotourism costs                               | Cost of food                                                                                                                                                   |                        |
|                                                | Cost of transportation                                                                                                                                         |                        |
|                                                | Cost of using local facilities                                                                                                                                 |                        |
|                                                | Cost of input                                                                                                                                                  |                        |
|                                                | Cost of health services                                                                                                                                        |                        |
| Rules and regulations                          | Level of adherence to laws and regulations                                                                                                                     |                        |
|                                                | Access to local laws and regulations                                                                                                                           |                        |

**Table S4.** List of local community participation indicators in sustainable ecotourism development in Protected Areas.

| Variables     | Indicators                                                                        | References       |
|---------------|-----------------------------------------------------------------------------------|------------------|
| Participation | Level of participation in conservation and sustainable ecotourism development     | [31,46,49,50,57] |
|               | Level of participation in protection of ecological resources                      |                  |
|               | Level of participation in development of protected areas                          |                  |
|               | Level of participation in promoting and encouraging protection of these areas     |                  |
|               | Level of participation in protection of nature and natural monuments              |                  |
|               | Level of participation in protection of plants, trees and green spaces            |                  |
|               | Level of participation in protection of animal species                            |                  |
|               | Level of participation in maintaining environment from pollutions                 |                  |
|               | Level of participation in supporting from art, culture, and handicrafts monuments |                  |
|               | Level of participation in adherence to laws and regulations                       |                  |
|               | Level of participation in reporting illegal hunting                               |                  |
|               | Level of participation in reporting deforestation and destruction of vegetation   |                  |
|               | Level of participation in public training                                         |                  |
|               | Level of participation in management and planning                                 |                  |
|               | Level of participation in advertising and awareness                               |                  |

**Table S5.** List of factors affecting on local communities' participation level in these areas (results of round 1 of Delphi method). Values were measured on a 5-point Likert scale ranging from “strongly disagree (1) to strongly agree (5)”.

| Studied area                                                        | Factors                                                                                                        | n  | Mean | SD    | V     | Rank | Total mean |
|---------------------------------------------------------------------|----------------------------------------------------------------------------------------------------------------|----|------|-------|-------|------|------------|
| Lar National Park                                                   | (1) Existence of pristine habitats and high species richness (rare species such as <i>Salmo trutta fario</i> ) | 40 | 3.48 | 1.030 | 1.000 | 5    | 2.91       |
|                                                                     | (2) High distance from metropolis of Tehran                                                                    | 40 | 3.36 | 1.000 | 2.030 | 6    |            |
|                                                                     | (3) Low access of tourists and visitors to the area                                                            | 40 | 2.51 | 1.029 | 1.000 | 10   |            |
|                                                                     | (4) High ecological sensitiveness                                                                              | 40 | 3.33 | 1.000 | 1.000 | 7    |            |
|                                                                     | (5) High restrictions in develop physical and economic activities                                              | 40 | 2.4  | 1.000 | 2.000 | 11   |            |
|                                                                     | (6) High level of attachment and interest to pristine nature among local communities                           | 40 | 4.58 | 1.000 | 2.055 | 1    |            |
|                                                                     | (7) Income status of local communities                                                                         | 40 | 1.57 | 1.000 | 2.023 | 15   |            |
|                                                                     | (8) Low number of tourists                                                                                     | 40 | 2.33 | 1.030 | 1.000 | 12   |            |
|                                                                     | (9) Adherence to laws and regulations                                                                          | 40 | 4.19 | 1.000 | 1.000 | 2    |            |
|                                                                     | (10) Existence of indigenous knowledge                                                                         | 40 | 2.2  | 1.000 | 1.000 | 13   |            |
|                                                                     | (11) Education level of local communities                                                                      | 40 | 1.63 | 1.000 | 1.000 | 14   |            |
|                                                                     | (12) High level of local communities' awareness                                                                | 40 | 3.86 | 1.024 | 1.000 | 3    |            |
|                                                                     | (13) High number of young people among local communities                                                       | 40 | 1.55 | 1.000 | 1.000 | 16   |            |
|                                                                     | (14) Protection importance of the area among local communities                                                 | 40 | 3.2  | 1.000 | 1.000 | 8    |            |
|                                                                     | (15) Encourage development of participation to funder protection                                               | 40 | 3.74 | 1.000 | 2.036 | 4    |            |
|                                                                     | (16) High importance of traditions and cultural values among local communities                                 | 40 | 2.7  | 1.030 | 1.000 | 9    |            |
| Jajrud Protected Area with the Sustainable Use of Natural Resources | (1) Located in the metropolis of Tehran                                                                        | 40 | 3.73 | 1.000 | 1.000 | 3    | 2.65       |
|                                                                     | (2) High access for tourists and visitors                                                                      | 40 | 2.37 | 1.000 | 2.000 | 10   |            |
|                                                                     | (3) High number of tourists                                                                                    | 40 | 1.47 | 1.030 | 1.060 | 13   |            |
|                                                                     | (4) High capacity to develop physical and economic activities                                                  | 40 | 3.2  | 1.000 | 1.000 | 7    |            |
|                                                                     | (5) Low level of place attachment and ownership among local communities                                        | 40 | 3.39 | 1.000 | 1.043 | 5    |            |
|                                                                     | (6) Low level of ecological sensitivities                                                                      | 40 | 2.45 | 1.000 | 1.000 | 9    |            |
|                                                                     | (7) Low level of protection importance among local communities                                                 | 40 | 4    | 1.000 | 1.000 | 1    |            |
|                                                                     | (8) Income status of local communities                                                                         | 40 | 1.32 | 1.000 | 1.000 | 15   |            |
|                                                                     | (9) Destroyed nature                                                                                           | 40 | 1.75 | 1.000 | 1.000 | 12   |            |
|                                                                     | (10) Low level of awareness and education among local communities                                              | 40 | 3.86 | 1.029 | 1.000 | 2    |            |
|                                                                     | (11) Education level of local communities                                                                      | 40 | 1.26 | 1.030 | 1.000 | 16   |            |
|                                                                     | (12) Lack of indigenous knowledge and affected by urban development                                            | 40 | 3.58 | 1.000 | 1.000 | 4    |            |
|                                                                     | (13) Lack of attention to laws and regulations                                                                 | 40 | 2.27 | 1.000 | 2.030 | 11   |            |
|                                                                     | (14) High number of young people among local communities                                                       | 40 | 1.39 | 1.000 | 1.000 | 14   |            |
|                                                                     | (15) High number of various organizations and lack of attention to development of participation                | 40 | 3.28 | 1.000 | 1.000 | 6    |            |
|                                                                     | (16) Low importance of traditions and cultural values among local communities                                  | 40 | 3.11 | 1.000 | 1.000 | 8    |            |

**Table S6.** List of factors affecting on local communities' participation level in these areas (results of round 2 of Delphi method). Values were measured on a 5-point Likert scale ranging from “strongly disagree (1) to strongly agree (5)”.

| Studied area                                                        | Factors                                                                                                        | n  | Mean | SD    | V     | Rank | Total mean |
|---------------------------------------------------------------------|----------------------------------------------------------------------------------------------------------------|----|------|-------|-------|------|------------|
| Lar National Park                                                   | (1) Existence of pristine habitats and high species richness (rare species such as <i>Salmo trutta fario</i> ) | 37 | 3.50 | 1.000 | 1.000 | 5    | 3.04       |
|                                                                     | (2) High distance from metropolis of Tehran                                                                    | 37 | 3.43 | 1.000 | 2.030 | 6    |            |
|                                                                     | (3) Low access of tourists and visitors to the area                                                            | 37 | 2.52 | 1.029 | 1.000 | 10   |            |
|                                                                     | (4) High ecological sensitiveness                                                                              | 37 | 3.34 | 1.000 | 1.000 | 7    |            |
|                                                                     | (5) High restrictions in develop physical and economic activities                                              | 37 | 1.89 | 1.000 | 2.000 | 12   |            |
|                                                                     | (6) High level of attachment and interest to pristine nature among local communities                           | 37 | 4.51 | 1.000 | 2.055 | 1    |            |
|                                                                     | (7) Low number of tourists                                                                                     | 37 | 2.35 | 1.030 | 1.000 | 11   |            |
|                                                                     | (8) Adherence to laws and regulations                                                                          | 37 | 4.25 | 1.000 | 1.000 | 2    |            |
|                                                                     | (9) Existence of indigenous knowledge                                                                          | 37 | 1.72 | 1.000 | 1.000 | 13   |            |
|                                                                     | (10) High level of local communities' awareness                                                                | 37 | 3.84 | 1.024 | 1.000 | 3    |            |
|                                                                     | (11) Protection importance of the area among local communities                                                 | 37 | 3.19 | 1.000 | 1.000 | 8    |            |
|                                                                     | (12) Encourage development of participation to funder protection                                               | 37 | 3.68 | 1.000 | 2.036 | 4    |            |
|                                                                     | (13) High number of young people among local communities                                                       | 37 | 1.64 | 1.000 | 1.000 | 14   |            |
|                                                                     | (14) High importance of traditions and cultural values among local communities                                 | 37 | 2.66 | 1.030 | 1.000 | 9    |            |
| Jajrud Protected Area with the Sustainable Use of Natural Resources | (1) Located in the metropolis of Tehran                                                                        | 37 | 3.74 | 1.000 | 1.000 | 3    | 2.80       |
|                                                                     | (2) High access for tourists and visitors                                                                      | 37 | 2.32 | 1.000 | 2.000 | 10   |            |
|                                                                     | (3) High number of tourists                                                                                    | 37 | 1.32 | 1.030 | 1.060 | 13   |            |
|                                                                     | (4) High capacity to develop physical and economic activities                                                  | 37 | 3.21 | 1.000 | 1.000 | 7    |            |
|                                                                     | (5) Low level of place attachment and ownership among local communities                                        | 37 | 3.40 | 1.000 | 1.043 | 5    |            |
|                                                                     | (6) Low level of ecological sensitivities                                                                      | 37 | 2.46 | 1.000 | 1.000 | 9    |            |
|                                                                     | (7) Low level of protection importance among local communities                                                 | 37 | 4.03 | 1.000 | 1.000 | 1    |            |
|                                                                     | (8) Destroyed nature                                                                                           | 37 | 1.42 | 1.000 | 1.000 | 12   |            |
|                                                                     | (9) Low level of awareness and education among local communities                                               | 37 | 3.84 | 1.029 | 1.000 | 2    |            |
|                                                                     | (10) Lack of indigenous knowledge and affected by urban development                                            | 37 | 3.52 | 1.000 | 1.000 | 4    |            |
|                                                                     | (11) Lack of attention to laws and regulations                                                                 | 37 | 2.21 | 1.000 | 2.030 | 11   |            |
|                                                                     | (12) High number of various organizations and lack of attention to development of participation                | 37 | 3.33 | 1.000 | 1.000 | 6    |            |
|                                                                     | (13) High number of young people among local communities                                                       | 37 | 1.30 | 1.000 | 2.030 | 14   |            |
|                                                                     | (14) Low importance of traditions and cultural values among local communities                                  | 37 | 3.14 | 1.000 | 1.000 | 8    |            |
